# Supplementary material
Source: PubMed Central journal article supplement (PMC6467301)
Supplement: rccm.201807-1287OC_rebuli_data_supplement.pdf [file rccm.201807-1287OC_rebuli_data_supplement.pdf]

## **Online Data Supplement**

### **Wood smoke exposure alters human inflammatory responses to viral infection in a sex-specific manner: A Randomized, Placebo-Controlled Study**

Meghan E. Rebuli, Adam M. Speen, Elizabeth M. Martin, Kezia A. Addo, Erica A. Pawlak, Ellen Glista-Baker, Carole Robinette, Haibo Zhou, Terry L. Noah, Ilona Jaspers

## **Supplementary Methods:**

### *Subject Recruitment*

Subjects were identified from our internal database as well as self-identification from emails, flyers, and a website.

### *Inclusion Criteria*

Inclusion criteria included normal lung function (as defined by FVC > 75% predicted for gender, ethnicity, age, and height; FEV<sub>1</sub> > 75% predicted; FEV<sub>1</sub>/FVC ratio > 0.70 and < 0.90), oxygen saturation of > 94%, normal blood pressure (systolic between 140-90, diastolic between 90-60 mm Hg), Symptom Score no greater than 6 (out of 39), body temperature of no greater than 37.8°C (measured orally).

### *Exclusion Criteria*

Exclusion criteria included a history of significant chronic illness (including diabetes, autoimmune diseases, immunodeficiency, known ischemic heart disease, chronic respiratory disease), positive pregnancy test within 48 hours of the time of challenge, use of any inhaled substance (for medical or recreational purposes; nonsmokers must have been abstinent from smoking for the prior 12 months, receipt of LAIV in the current season, history of allergy to eggs, acute (non-chronic) medical conditions (including but not limited to: pneumonia or bronchitis requiring antibiotics, febrile illnesses, flu-like symptoms), unspecified illnesses, expected exposure of subject to immunocompromised individuals for 3 weeks following inoculation.

### *WSP Generation*

WSPs were generated according to the protocol previously described (5). Briefly, red oak wood, harvested in 2007 and used from 2014-2015 in this study, was heated on an electric heating element to generate wood smoke. The smoke was extracted from the chimney and injected into the chamber which was maintained at 22°C and 40% humidity. Smoke concentration was maintained and measured using a tapered element oscillating microbalance (TEOM; Thermo Fisher Scientific, Franklin, Massachusetts, USA) and a Model DR-4000 DataRAM™ (Thermo Fisher Scientific). The target concentration for the TEOM was set to be 500 µg/cm<sup>3</sup>. To quantify subject exposure conditions, a DataRAM™ aerosol monitor, a TEOM, a Condensation Particle Counter (CPC) aerosol monitor, and a Versatile Air Pollution Sampler (VAPS), configured with two Teflon® and one Nuclepore® filters sampled inlet air to the chamber. Particle mass and size were maintained and verified with a Model 3022A CPC (TSI, Shoreview, Minnesota, USA), a Model 3080L SMPS (TSI), and a versatile air pollution sampler (VAPS; URG, Chapel Hill, North Carolina, USA). A Scanning Mobility Particle Sizer™ (SMPS™) also sampled the inlet air to verify that the particle size distribution did not vary significantly over the course of the study. In addition, the Pollutant Control System (PCS) monitored critical operating parameters (temperature flow, relative humidity, background CO, and total hydrocarbon concentrations) in the chambers. The DataRAM™ was used as a secondary monitor. As a safety precaution, the system was programmed to automatically shut down if the concentration exceeded 1200 µg/cm<sup>3</sup> or 40 ppm CO. A summary of particulate and pollutant gas exposure amounts is reported in Table E1. Additional information on the characterization

of particulates and gases from red oak smoke can be found in studies previously published (5, 61).

#### *Data Sharing Statement*

Individual participant data including online dictionaries will not be made available. Data that underlie the results reported in this article after de-identification (text, tables, figures) will be available in GEO (Figure 3 and 4 and Tables E2-E5) and upon request by those defined below. Study protocol, statistical analysis plan, analytic code will also be available upon request by those defined below. Data will be available starting 6 months following publication and ending 18 months following publication. Data will be shared with researchers who provide a methodologically sound proposal for analyses to achieve aims in the approved proposal. Proposals should be directed to the corresponding author. To gain access, data requestors will need to sign a data access agreement.

**Supplementary Tables:**

**Table E1: Particulate and Pollutant Gas Exposure Summary**

| Exposure      | Particulate                    | Gas              |                   |                |                 |                 |
|---------------|--------------------------------|------------------|-------------------|----------------|-----------------|-----------------|
|               | PM <sub>2.5</sub>              | CO               | Total Hydrocarbon | O <sub>3</sub> | NO <sub>x</sub> | SO <sub>2</sub> |
| FA (n=19)     | Max = 3.1<br>µg/m <sup>3</sup> | 0.1 ± 0.1<br>ppm | 1.9 ± 0.1<br>ppm  | 0 ppm          | 0 ppm           | 0 ppm           |
| WSP<br>(n=20) | 488 ± 22<br>µg/m <sup>3</sup>  | 2.3 ± 0.6<br>ppm | 3.9 ± 0.4<br>ppm  | 0 ppm          | 0 ppm           | 0 ppm           |

**Table E1: Particulate and Pollutant Gas Exposure Summary.** Average of particulate and pollutant gas conditions during 2 hour WSP exposure, except for FA PM<sub>2.5</sub>, where maximum exposure is noted. Mean ± SD is reported.

**Table E2:** Effect Measure Modification – Exposure and Exposure\*Sex interaction using AUC

| <b>Gene Name</b> | <b>p-value (WSP vs. FA)</b> | <b>p-value (Exposure*Sex )</b> | <b>Fold Change (WSP vs. FA)</b> | <b>Fold Change (M vs. F)</b> |
|------------------|-----------------------------|--------------------------------|---------------------------------|------------------------------|
| <i>CD4</i>       | 0.065406                    | 0.003305                       | 1.36983                         | 1.19543                      |
| <i>ARG1</i>      | 0.546377                    | 0.007978                       | -1.18975                        | -1.18331                     |
| <i>MAFF</i>      | 0.861526                    | 0.008522                       | 1.03227                         | 1.45941                      |
| <i>LTB4R</i>     | 0.789467                    | 0.008734                       | 1.05639                         | 1.71373                      |
| <i>CD55</i>      | 0.383938                    | 0.014967                       | 1.25122                         | 1.68746                      |
| <i>C1S</i>       | 0.676886                    | 0.016879                       | -1.14073                        | -1.38377                     |
| <i>TBXA2R</i>    | 0.699581                    | 0.017826                       | -1.16967                        | -1.402                       |
| <i>PIK3C2G</i>   | 0.836377                    | 0.022538                       | 1.08806                         | -1.47858                     |
| <i>TGFBR1</i>    | 0.920132                    | 0.023716                       | -1.01056                        | 1.3175                       |
| <i>HMGB2</i>     | 0.714777                    | 0.024107                       | -1.06897                        | 1.54209                      |
| <i>C4A</i>       | 0.436519                    | 0.030747                       | -1.29897                        | -1.48316                     |
| <i>C6</i>        | 0.999092                    | 0.033212                       | -1.00053                        | -1.38121                     |
| <i>C8A</i>       | 0.945154                    | 0.033302                       | -1.03504                        | -1.42154                     |
| <i>MAP3K5</i>    | 0.655475                    | 0.03358                        | -1.07004                        | 1.15964                      |
| <i>TGFB1</i>     | 0.344201                    | 0.035437                       | 1.29108                         | 2.33352                      |
| <i>MASP1</i>     | 0.769095                    | 0.035625                       | 1.12889                         | -1.36591                     |
| <i>NOD2</i>      | 0.34118                     | 0.036881                       | -1.28437                        | 1.01632                      |
| <i>TNFSF14</i>   | 0.713696                    | 0.040306                       | -1.15059                        | 1.09137                      |
| <i>FASLG</i>     | 0.34914                     | 0.041163                       | 1.35263                         | -1.39114                     |
| <i>HDAC4</i>     | 0.998504                    | 0.041418                       | 1.00034                         | 1.24218                      |
| <i>MAP2K6</i>    | 0.987699                    | 0.041807                       | 1.00296                         | -1.09873                     |
| <i>CCL16</i>     | 0.763436                    | 0.042055                       | -1.13348                        | -1.52762                     |
| <i>MYL2</i>      | 0.513148                    | 0.044467                       | 1.32503                         | -1.20074                     |
| <i>IL21</i>      | 0.584261                    | 0.048331                       | 1.28682                         | -1.0572                      |
| <i>IL12B</i>     | 0.325895                    | 0.048969                       | -1.66355                        | -2.32097                     |

**Table E3:** Effect of WSP on response to LAIV using AUC**Male:**

| <b>Gene Name</b> | <b>p-value(Exposure)</b> | <b>Fold Change (WSP vs. FA)</b> |
|------------------|--------------------------|---------------------------------|
| <i>CD4</i>       | 0.01385                  | 2.2334                          |
| <i>CCR7</i>      | 0.01713                  | 3.06097                         |
| <i>CSF2</i>      | 0.021554                 | 4.10801                         |
| <i>PLCB1</i>     | 0.022174                 | 2.01468                         |
| <i>MASP1</i>     | 0.026872                 | 4.02212                         |
| <i>IL10</i>      | 0.036279                 | 2.67509                         |
| <i>CCR4</i>      | 0.036974                 | 4.05198                         |
| <i>IL9</i>       | 0.038358                 | 3.76082                         |
| <i>CSF1</i>      | 0.041238                 | 2.43764                         |
| <i>IRF5</i>      | 0.042387                 | 1.67746                         |
| <i>IL23R</i>     | 0.044703                 | 2.95218                         |
| <i>FASLG</i>     | 0.04758                  | 3.76355                         |
| <i>C8A</i>       | 0.049139                 | 4.67001                         |

**Female:**

| <b>Gene Name</b> | <b>p-value(Exposure)</b> | <b>Fold Change (WSP vs. FA)</b> |
|------------------|--------------------------|---------------------------------|
| <i>HMGB2</i>     | 0.001364                 | -1.91603                        |
| <i>LTB4R</i>     | 0.001376                 | -2.06824                        |
| <i>DEFA1</i>     | 0.014651                 | -3.01252                        |
| <i>MAFF</i>      | 0.015025                 | -1.82179                        |
| <i>CYSLTR1</i>   | 0.018493                 | -2.17949                        |
| <i>IFIT2</i>     | 0.021802                 | -2.76806                        |
| <i>DDIT3</i>     | 0.026489                 | -2.13474                        |
| <i>TLR8</i>      | 0.027336                 | -2.4758                         |
| <i>MAPK14</i>    | 0.028024                 | -1.69729                        |
| <i>IL10RB</i>    | 0.028125                 | -1.55563                        |
| <i>ARG1</i>      | 0.028729                 | -2.63883                        |
| <i>MAP3K5</i>    | 0.029296                 | -1.55263                        |
| <i>IL6R</i>      | 0.038415                 | -2.65308                        |
| <i>HSH2D</i>     | 0.039313                 | -1.80766                        |
| <i>PPP1R12B</i>  | 0.040401                 | -1.94256                        |
| <i>AGER</i>      | 0.042347                 | -1.74823                        |
| <i>RAF1</i>      | 0.044097                 | -1.57108                        |

*BCL6* 0.048679 -1.68466

**Table E4:** Sex-specific LAIV effects (pre- vs post-inoculation) in FA group.

**Male:**

| Gene Name    | Day 0 vs. Day 1 |                             | Gene Name        | Day 0 vs. Day 2 |                             |
|--------------|-----------------|-----------------------------|------------------|-----------------|-----------------------------|
|              | p-value (LAIV)  | Fold Change (Pre- vs Post-) |                  | p-value (LAIV)  | Fold Change (Pre- vs Post-) |
| <i>TREM2</i> | 0.007813        | 2.04916038                  | <i>CCL8</i>      | 0.007813        | 37.41135458                 |
| <i>CXCL1</i> | 0.007813        | 1.82940651                  | <i>IL1A</i>      | 0.007813        | 3.154977969                 |
| <i>FLT1</i>  | 0.007813        | 1.682213013                 | <i>TLR7</i>      | 0.007813        | 3.107220217                 |
| <i>CCL2</i>  | 0.01563         | 2.820317666                 | <i>HLA-DRB1</i>  | 0.007813        | 2.697422642                 |
| <i>IL8</i>   | 0.01563         | 1.969357808                 | <i>CXCL9</i>     | 0.01563         | 25.43810562                 |
| <i>DDIT3</i> | 0.02344         | 2.136475954                 | <i>CCL2</i>      | 0.01563         | 19.40880389                 |
| <i>MRC1</i>  | 0.02344         | 1.893308702                 | <i>HLA-DRA</i>   | 0.01563         | 3.037885422                 |
| <i>IL1A</i>  | 0.03906         | 2.605211393                 | <i>CD40</i>      | 0.01563         | 2.828447025                 |
| <i>DEFA1</i> | 0.03906         | 1.823248736                 | <i>CCR2</i>      | 0.01563         | 2.764976637                 |
| <i>MMP9</i>  | 0.03906         | 1.645016841                 | <i>OAS2</i>      | 0.01563         | 2.022748378                 |
|              |                 |                             | <i>CXCL10</i>    | 0.02344         | 39.03072232                 |
|              |                 |                             | <i>Infl_B_NA</i> | 0.03906         | 6.505346042                 |
|              |                 |                             | <i>NOS2</i>      | 0.03906         | 3.320672148                 |
|              |                 |                             | <i>MRC1</i>      | 0.03906         | 3.178906456                 |
|              |                 |                             | <i>IRF3</i>      | 0.03906         | -1.57405723                 |
|              |                 |                             | <i>HSPB1</i>     | 0.03906         | -1.848761258                |

**Female:**

| Gene Name            | Day 0 vs. Day 1 |                             | Gene Name     | Day 0 vs. Day 2 |                             |
|----------------------|-----------------|-----------------------------|---------------|-----------------|-----------------------------|
|                      | p-value (LAIV)  | Fold Change (Pre- vs Post-) |               | p-value (LAIV)  | Fold Change (Pre- vs Post-) |
| <i>Infl_B_NA</i>     | 0.003906        | 9.241010156                 | <i>CCL3</i>   | 0.003906        | 51.11179507                 |
| <i>CCL23</i>         | 0.003906        | 8.016063548                 | <i>CCL4</i>   | 0.003906        | 27.64120375                 |
| <i>CCL8</i>          | 0.003906        | 6.244748105                 | <i>CXCL10</i> | 0.003906        | 20.6824397                  |
| <i>CCL7</i>          | 0.003906        | 5.945413521                 | <i>CCL2</i>   | 0.003906        | 15.3966243                  |
| <i>Infl_A_Tex_M1</i> | 0.003906        | 5.921301288                 | <i>CXCL9</i>  | 0.003906        | 7.589648458                 |
| <i>IL10</i>          | 0.003906        | 5.881293239                 | <i>IL1A</i>   | 0.003906        | 6.518482522                 |
| <i>CCL2</i>          | 0.003906        | 4.925099043                 | <i>CCL8</i>   | 0.003906        | 6.446695724                 |
| <i>IL12A</i>         | 0.003906        | 4.785271906                 | <i>CXCR4</i>  | 0.003906        | 5.937900187                 |
| <i>CCL3</i>          | 0.003906        | 4.659278875                 | <i>CSF1</i>   | 0.003906        | 5.722438352                 |
| <i>IL3</i>           | 0.003906        | 4.124752983                 | <i>IL8</i>    | 0.003906        | 4.579654919                 |



|                      |          |             |                  |          |             |
|----------------------|----------|-------------|------------------|----------|-------------|
| <i>PTGS1</i>         | 0.003906 | 3.744985862 | <i>IL1RN</i>     | 0.003906 | 3.859965046 |
| <i>CCL22</i>         | 0.003906 | 3.404143238 | <i>C3AR1</i>     | 0.003906 | 3.641615968 |
| <i>MYL2</i>          | 0.003906 | 3.378943739 | <i>IFIT1</i>     | 0.003906 | 3.219023805 |
| <i>CCL4</i>          | 0.003906 | 3.130882703 | <i>IL1RAP</i>    | 0.003906 | 2.972443638 |
| <i>TLR9</i>          | 0.003906 | 3.005630534 | <i>TNFAIP3</i>   | 0.003906 | 2.812820594 |
| <i>CCR7</i>          | 0.003906 | 2.995848138 | <i>PTGER4</i>    | 0.003906 | 2.792303015 |
| <i>GRB2</i>          | 0.003906 | 2.961689133 | <i>IRF7</i>      | 0.003906 | 2.665142036 |
| <i>IL1A</i>          | 0.003906 | 2.838743642 | <i>RIPK2</i>     | 0.003906 | 2.544761017 |
| <i>CSF1</i>          | 0.003906 | 2.831061418 | <i>TLR2</i>      | 0.003906 | 2.453384271 |
| <i>PTGDR2</i>        | 0.003906 | 2.80505909  | <i>MX2</i>       | 0.003906 | 2.437732698 |
| <i>SMAD7</i>         | 0.003906 | 2.525189697 | <i>CXCL1</i>     | 0.003906 | 2.392780205 |
| <i>CCR4</i>          | 0.003906 | 2.500589929 | <i>HIF1A</i>     | 0.003906 | 2.367771194 |
| <i>C9</i>            | 0.003906 | 2.466775395 | <i>TLR4</i>      | 0.003906 | 2.29578065  |
| <i>CRP</i>           | 0.003906 | 2.352060815 | <i>TNF</i>       | 0.003906 | 2.262662251 |
| <i>CCL19</i>         | 0.003906 | 2.337546417 | <i>OASL</i>      | 0.003906 | 2.250103643 |
| <i>CCL21</i>         | 0.003906 | 2.232478883 | <i>CXCR2</i>     | 0.003906 | 2.112985494 |
| <i>IL7</i>           | 0.003906 | 1.968441815 | <i>TGFB1</i>     | 0.003906 | 2.089056194 |
| <i>NLRP3</i>         | 0.003906 | 1.961513372 | <i>RELB</i>      | 0.003906 | 2.081345794 |
| <i>IFNB1</i>         | 0.003906 | 1.572055806 | <i>NFKB1</i>     | 0.003906 | 1.992217883 |
| <i>IFNA1</i>         | 0.003906 | 1.555518767 | <i>PRKCB</i>     | 0.003906 | 1.969201836 |
| <i>CSF2</i>          | 0.007812 | 5.844004388 | <i>PTGS2</i>     | 0.003906 | 1.836447223 |
| <i>CCL16</i>         | 0.007812 | 4.049074241 | <i>MMP9</i>      | 0.003906 | 1.816765413 |
| <i>HSPB2</i>         | 0.007812 | 4.007860363 | <i>PGK1</i>      | 0.003906 | 1.54136075  |
| <i>IL12B</i>         | 0.007812 | 3.090095132 | <i>PTK2</i>      | 0.003906 | 0.3650952   |
| <i>IL2</i>           | 0.007812 | 2.394964306 | <i>Infl_B_HA</i> | 0.007812 | 9.083687881 |
| <i>PTGER2</i>        | 0.007812 | 2.126168291 | <i>IL6</i>       | 0.007812 | 4.970110161 |
| <i>CXCL10</i>        | 0.01172  | 10.67338276 | <i>CCR1</i>      | 0.007812 | 3.417586177 |
| <i>IL22</i>          | 0.01172  | 4.361853282 | <i>IL1B</i>      | 0.007812 | 3.363155418 |
| <i>LTA</i>           | 0.01172  | 2.701166936 | <i>MAFF</i>      | 0.007812 | 3.109968538 |
| <i>DEFA1</i>         | 0.01172  | 2.674307978 | <i>CCL7</i>      | 0.007812 | 2.896815066 |
| <i>CYSLTR2</i>       | 0.01172  | 2.595014725 | <i>DDIT3</i>     | 0.007812 | 2.767150296 |
| <i>CD86</i>          | 0.01172  | 2.35001837  | <i>IL6R</i>      | 0.007812 | 2.318650061 |
| <i>LIMK1</i>         | 0.01172  | 1.752905397 | <i>CEBPB</i>     | 0.007812 | 2.290620169 |
| <i>Infl_A_Tex_HA</i> | 0.01427  | 9.93340872  | <i>FLT1</i>      | 0.007812 | 2.144770916 |
| <i>CD55</i>          | 0.01953  | 2.082457393 | <i>IL18RAP</i>   | 0.007812 | 2.107655338 |
| <i>GNGT1</i>         | 0.01953  | 2.067370605 | <i>IFI44</i>     | 0.007812 | 1.791161703 |
| <i>MEF2C</i>         | 0.01953  | 2.001308491 | <i>IL1R1</i>     | 0.007812 | 1.714933354 |
| <i>IL13</i>          | 0.01953  | 1.943371445 | <i>Infl_B_NA</i> | 0.01172  | 33.5156007  |
| <i>AREG</i>          | 0.01953  | 1.943120324 | <i>IFIT3</i>     | 0.01172  | 4.68865956  |
| <i>IL21</i>          | 0.01953  | 1.88821308  | <i>NLRP3</i>     | 0.01172  | 3.089140361 |
| <i>PTGER4</i>        | 0.01953  | 1.735326728 | <i>STAT1</i>     | 0.01172  | 2.844395051 |

|                      |         |             |                 |         |             |
|----------------------|---------|-------------|-----------------|---------|-------------|
| <i>TLR2</i>          | 0.01953 | 1.610243036 | <i>TYROBP</i>   | 0.01172 | 2.298562619 |
| <i>CFB</i>           | 0.01953 | 0.601634495 | <i>LTB</i>      | 0.01172 | 2.131023484 |
| <i>IL4</i>           | 0.02734 | 3.955951735 | <i>STAT3</i>    | 0.01172 | 1.581107521 |
| <i>IL9</i>           | 0.02734 | 3.601163503 | <i>RELA</i>     | 0.01172 | 1.53013144  |
| <i>C5</i>            | 0.02734 | 3.529136704 | <i>CCL20</i>    | 0.01953 | 3.700744919 |
| <i>C15</i>           | 0.02734 | 2.595762325 | <i>LY96</i>     | 0.01953 | 2.424028501 |
| <i>TLR5</i>          | 0.02734 | 2.365599543 | <i>CCL22</i>    | 0.01953 | 2.423419158 |
| <i>HDAC4</i>         | 0.02734 | 2.105602563 | <i>IRF1</i>     | 0.01953 | 2.246912296 |
| <i>C4A</i>           | 0.02734 | 1.921266989 | <i>CXCR1</i>    | 0.01953 | 2.09639244  |
| <i>CXCL3</i>         | 0.02734 | 1.897269868 | <i>CD86</i>     | 0.01953 | 2.00691079  |
| <i>IFNG</i>          | 0.02734 | 1.728705651 | <i>ITGB2</i>    | 0.01953 | 1.876625252 |
| <i>IFIT1</i>         | 0.02734 | 1.684730433 | <i>NOD2</i>     | 0.01953 | 1.808692879 |
| <i>IL18</i>          | 0.02734 | 1.625060076 | <i>MAPKAPK5</i> | 0.01953 | 0.502761281 |
| <i>NOD2</i>          | 0.02734 | 1.563775625 | <i>CXCL2</i>    | 0.02734 | 4.027751908 |
| <i>IL15</i>          | 0.03906 | 3.470491365 | <i>IFIT2</i>    | 0.02734 | 3.491921718 |
| <i>ARG1</i>          | 0.03906 | 2.797587519 | <i>HLA-DRA</i>  | 0.02734 | 2.000205579 |
| <i>CCL24</i>         | 0.03906 | 2.592214441 | <i>HLA-DRB1</i> | 0.02734 | 1.746071379 |
| <i>PTGIR</i>         | 0.03906 | 2.564713532 | <i>NFE2L2</i>   | 0.02734 | 1.616362809 |
| <i>CXCL2</i>         | 0.03906 | 2.461393515 | <i>MEF2C</i>    | 0.02734 | 1.591370672 |
| <i>C8A</i>           | 0.03906 | 1.912615337 | <i>HMGNI</i>    | 0.02734 | 0.619129142 |
| <i>PRKCA</i>         | 0.03906 | 1.854890899 | <i>C2</i>       | 0.02734 | 0.583897024 |
| <i>TGFB1</i>         | 0.03906 | 1.776271808 | <i>CCR7</i>     | 0.03906 | 2.07455971  |
| <i>TNF</i>           | 0.03906 | 1.730627211 | <i>ALOX5</i>    | 0.03906 | 1.90361503  |
| <i>IL1RN</i>         | 0.03906 | 1.715646595 | <i>FOS</i>      | 0.03906 | 1.526512311 |
| <i>MAFF</i>          | 0.03906 | 1.596056771 | <i>CFB</i>      | 0.03906 | 0.654154003 |
| <i>OASL</i>          | 0.03906 | 1.505086892 | <i>PLA2G4A</i>  | 0.03906 | 0.621616209 |
| <i>CD163</i>         | 0.03906 | 1.501528666 | <i>HSPB1</i>    | 0.03906 | 0.588808602 |
| <i>Infl_A_Cal_NA</i> | 0.04232 | 6.128551467 |                 |         |             |

**Table E5:** Baseline sex differences in gene expression, Day 0 (no exposure).

| <b>Gene Name</b> | <b>p-value (Sex)</b> | <b>Fold Change (M vs. F)</b> |
|------------------|----------------------|------------------------------|
| <i>RHOA</i>      | 0.000203             | 1.54542                      |
| <i>CXCL1</i>     | 0.000291             | 3.18367                      |
| <i>NOS2</i>      | 0.000375             | -2.49951                     |
| <i>PRKCB</i>     | 0.000557             | 4.8067                       |
| <i>IL8</i>       | 0.000592             | 5.6267                       |
| <i>RELA</i>      | 0.000613             | 1.48478                      |
| <i>LY96</i>      | 0.000661             | 4.30209                      |
| <i>IL1RAP</i>    | 0.000685             | 3.85854                      |
| <i>HIF1A</i>     | 0.000862             | 2.64982                      |
| <i>AGER</i>      | 0.000874             | 2.4876                       |
| <i>TGFB1</i>     | 0.000899             | 3.98756                      |
| <i>TLR4</i>      | 0.000972             | 4.88807                      |
| <i>ALOX5</i>     | 0.001023             | 4.09038                      |
| <i>TLR2</i>      | 0.001134             | 3.78333                      |
| <i>MX2</i>       | 0.001265             | 3.00611                      |
| <i>TYROBP</i>    | 0.001296             | 4.52392                      |
| <i>STAT3</i>     | 0.001371             | 1.91787                      |
| <i>MMP9</i>      | 0.001518             | 3.68616                      |
| <i>HRAS</i>      | 0.001525             | -2.22978                     |
| <i>PTGS2</i>     | 0.00162              | 4.56818                      |
| <i>CEBPB</i>     | 0.001778             | 3.61829                      |
| <i>ITGB2</i>     | 0.001869             | 3.92476                      |
| <i>IL6R</i>      | 0.002001             | 3.66127                      |
| <i>BCL6</i>      | 0.002012             | 2.15153                      |
| <i>CXCR2</i>     | 0.002057             | 4.93035                      |
| <i>NLRP3</i>     | 0.002059             | 3.72431                      |
| <i>IRF7</i>      | 0.002068             | 2.29229                      |
| <i>RELB</i>      | 0.002077             | 2.66529                      |
| <i>HSH2D</i>     | 0.002174             | 2.69799                      |
| <i>MAFF</i>      | 0.002434             | 2.27959                      |
| <i>TNFAIP3</i>   | 0.002593             | 3.02043                      |
| <i>CCR1</i>      | 0.002604             | 3.68728                      |
| <i>LTB</i>       | 0.002923             | 4.66                         |
| <i>CFL1</i>      | 0.003024             | 1.58519                      |

|                 |          |          |
|-----------------|----------|----------|
| <i>CXCR4</i>    | 0.003193 | 3.88143  |
| <i>IL18</i>     | 0.003214 | -1.754   |
| <i>IL1RN</i>    | 0.003257 | 2.98848  |
| <i>CCR3</i>     | 0.003342 | 4.46706  |
| <i>IFIT3</i>    | 0.003666 | 2.90235  |
| <i>FOS</i>      | 0.003712 | 4.14904  |
| <i>NFE2L2</i>   | 0.003858 | 1.7471   |
| <i>PTK2</i>     | 0.003935 | -2.1961  |
| <i>DDIT3</i>    | 0.003973 | 3.05621  |
| <i>CXCR1</i>    | 0.004048 | 4.51161  |
| <i>MAPK14</i>   | 0.004212 | 2.0444   |
| <i>STAT1</i>    | 0.004343 | 2.20943  |
| <i>CCL24</i>    | 0.004409 | 2.42766  |
| <i>NR3C1</i>    | 0.00447  | 1.96393  |
| <i>RAPGEF2</i>  | 0.00493  | 1.72072  |
| <i>MYD88</i>    | 0.005096 | 1.77671  |
| <i>RPS6KA5</i>  | 0.005295 | 2.3037   |
| <i>MAPK1</i>    | 0.005351 | 1.96078  |
| <i>IFIT1</i>    | 0.005426 | 2.38115  |
| <i>MAP3K7</i>   | 0.005499 | -1.28615 |
| <i>TLR1</i>     | 0.005654 | 3.28904  |
| <i>PLA2G4A</i>  | 0.005931 | -1.54779 |
| <i>TLR3</i>     | 0.005939 | -1.8385  |
| <i>MKKNK1</i>   | 0.006556 | 2.1061   |
| <i>MAPKAPK5</i> | 0.007301 | -1.75643 |
| <i>MYC</i>      | 0.00735  | -1.85249 |
| <i>HSPB1</i>    | 0.008022 | -1.7798  |
| <i>RIPK2</i>    | 0.008297 | 2.19659  |
| <i>HDAC4</i>    | 0.008451 | 1.85009  |
| <i>TLR8</i>     | 0.008492 | 3.00011  |
| <i>NFKB1</i>    | 0.008507 | 1.64848  |
| <i>CD55</i>     | 0.00913  | 2.90335  |
| <i>MAP3K9</i>   | 0.009158 | -1.90767 |
| <i>IL18RAP</i>  | 0.009601 | 4.79324  |
| <i>IL1B</i>     | 0.010231 | 4.16997  |
| <i>C3AR1</i>    | 0.010454 | 2.62651  |
| <i>KEAP1</i>    | 0.01079  | -1.58589 |
| <i>HMGB2</i>    | 0.011177 | 1.82559  |
| <i>PTGER4</i>   | 0.011537 | 1.72997  |
| <i>IL1A</i>     | 0.011889 | 3.35446  |
| <i>HMGN1</i>    | 0.012921 | -1.57357 |

|                |          |          |
|----------------|----------|----------|
| <i>C2</i>      | 0.014071 | -1.89355 |
| <i>TLR6</i>    | 0.014211 | 2.96286  |
| <i>DEFA1</i>   | 0.014775 | 4.14247  |
| <i>IFIT2</i>   | 0.016702 | 2.81224  |
| <i>IRF1</i>    | 0.016787 | 1.88011  |
| <i>RAF1</i>    | 0.016807 | 1.69921  |
| <i>CCL4</i>    | 0.016869 | 8.58631  |
| <i>MEF2C</i>   | 0.016974 | 2.11682  |
| <i>LTB4R</i>   | 0.019573 | 1.76578  |
| <i>CYSLTR1</i> | 0.021013 | 2.22308  |
| <i>TNF</i>     | 0.03083  | 2.61108  |
| <i>GRB2</i>    | 0.031893 | 2.06566  |
| <i>CFD</i>     | 0.037971 | 3.29263  |
| <i>TRAF2</i>   | 0.043434 | -1.57651 |
| <i>CXCL2</i>   | 0.048547 | 1.65995  |

**Table E6: Effect Measure Modification – Protein Exposure\*Sex Interaction**

| <b>Protein Name</b> | <b>p-value (M vs. F)</b> | <b>p-value (WSP vs. FA)</b> | <b>p-value (Exposure*Sex)</b> | <b>Fold Change (WSP vs. FA)</b> | <b>Fold Change (M vs. F)</b> |
|---------------------|--------------------------|-----------------------------|-------------------------------|---------------------------------|------------------------------|
| IL13                | 0.449398                 | 0.433414                    | 0.044464                      | 1.10541                         | 1.10157                      |
| IL5                 | 0.061459                 | 0.710185                    | 0.102629                      | -1.20371                        | 2.82761                      |
| MDC                 | 0.270784                 | 0.731576                    | 0.110874                      | 1.06483                         | 1.22631                      |
| IL10                | 0.10673                  | 0.263933                    | 0.189159                      | -2.01318                        | 2.92646                      |
| IL8                 | 2.78E-05                 | 0.536215                    | 0.199618                      | 1.10633                         | 2.29227                      |
| MIP-1 $\alpha$      | 0.458098                 | 0.769743                    | 0.287585                      | 1.09043                         | 1.2473                       |
| IL2                 | 0.181377                 | 0.758284                    | 0.307595                      | 1.10092                         | 1.53604                      |
| MIP-1 $\beta$       | 0.20502                  | 0.312245                    | 0.369393                      | 1.35942                         | 1.475                        |
| INF- $\gamma$       | 0.196202                 | 0.715675                    | 0.418136                      | 1.44358                         | -4.74387                     |
| IL12p70             | 0.014553                 | 0.686489                    | 0.419449                      | -1.16367                        | 2.83948                      |
| IL12p40             | 0.196038                 | 0.665094                    | 0.425741                      | 1.13487                         | 1.47175                      |
| IL16                | 0.000914                 | 0.666951                    | 0.457824                      | 1.1414                          | 3.48495                      |
| Eotaxin             | 0.002856                 | 0.323257                    | 0.459396                      | -1.30144                        | 2.45387                      |
| GM-CSF              | 0.01412                  | 0.903646                    | 0.477808                      | 1.01629                         | 1.41453                      |
| VEGF                | 0.000417                 | 0.581807                    | 0.531825                      | 1.06328                         | 1.55223                      |
| Eotaxin-3           | 0.063634                 | 0.986167                    | 0.542495                      | 1.01026                         | 3.55312                      |
| TARC                | 0.003912                 | 0.449599                    | 0.589954                      | -1.19557                        | 2.13096                      |
| MCP-4               | 0.044077                 | 0.790822                    | 0.604339                      | 1.07593                         | 1.80252                      |
| IL15                | 0.157089                 | 0.818506                    | 0.617067                      | 1.03417                         | 1.23498                      |

|               |              |          |          |          |         |
|---------------|--------------|----------|----------|----------|---------|
| IL7           | 0.06119<br>6 | 0.779845 | 0.67837  | 1.05208  | 1.42289 |
| IL-1 $\alpha$ | 0.00064<br>4 | 0.869319 | 0.709925 | 1.0275   | 1.89178 |
| IL1 $\beta$   | 0.02865<br>8 | 0.555485 | 0.832339 | -1.16536 | 1.83038 |
| MCP-1         | 0.02804<br>4 | 0.140127 | 0.863453 | 1.34361  | 1.57356 |
| TNF $\alpha$  | 0.00247<br>7 | 0.827069 | 0.951545 | -1.04298 | 1.91131 |
